# Supplementary material for: Halogen-atom effect on the ultrafast photodissociation dynamics of the dihalomethanes CH2ICl and CH2BrI
Source: Royal Society of Chemistry journal article supplement (doi:10.1039/c8cp03600d), 2018-01-01
Supplement: c8cp03600d1.zip [file Supplementary_Information.pdf › Supplementary_Information.pdf]

# Halogen-atom effect on the ultrafast photodissociation dynamics of the dihalomethanes CH<sub>2</sub>ICl and CH<sub>2</sub>BrI<sup>†</sup>

Marta L. Murillo-Sánchez<sup>a</sup>, Sonia Marggi Poullain,<sup>b</sup> Juan J. Bajo,<sup>a</sup> María E. Corrales,<sup>a</sup> Jesús González-Vázquez,<sup>b,c</sup> and Luis Bañares<sup>\*a</sup>

## Supplementary Information

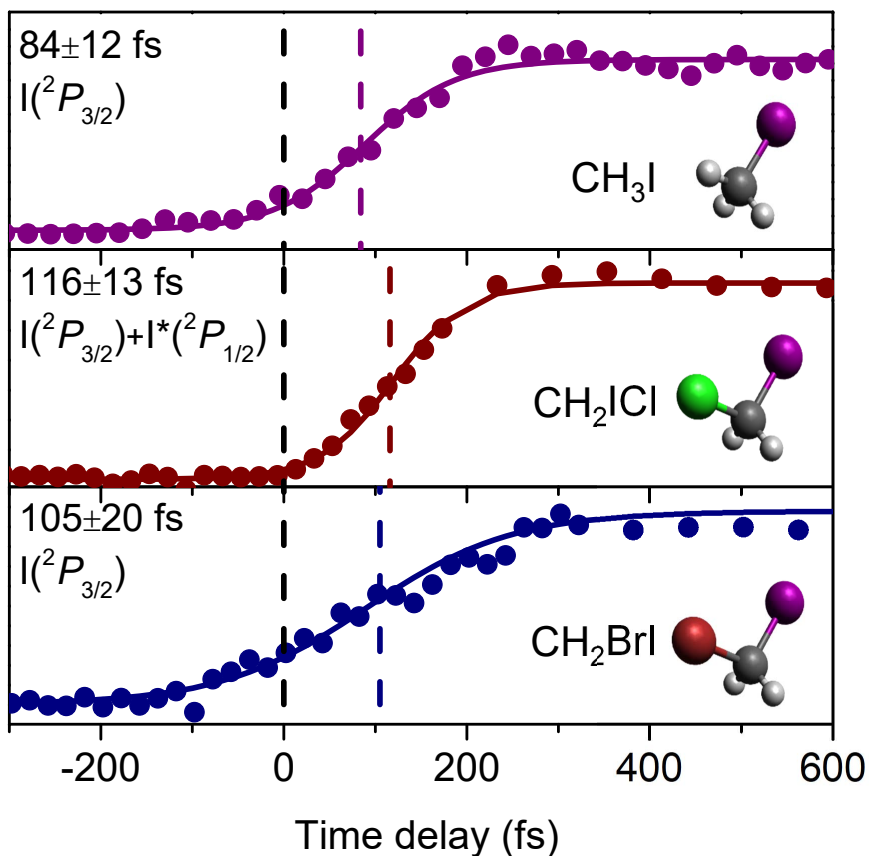

**Fig. S1** Transients measured for CH<sub>3</sub>I (top), CH<sub>2</sub>ICl (middle) and CH<sub>2</sub>IBr (bottom) for the I(<sup>2</sup>P<sub>3/2</sub>) channel (top,bottom) and I(<sup>2</sup>P<sub>3/2</sub>)+I(<sup>2</sup>P<sub>1/2</sub>) channels (middle) fitted using a Boltzmann sigmoidal function (solid line). The reaction (clocking) times are referred to the time zero found in situ by measuring the 1 + 1' ionization signal in xenon. Time zero is indicated in each panel by means of a vertical dashed line in black. The reaction time is defined as the time between time zero and the time corresponding to the middle of the rise of the transient (indicated by vertical dashed lines in each panel). The reaction times obtained as a mean value of several measurements along with the standard deviations are indicated in each panel.

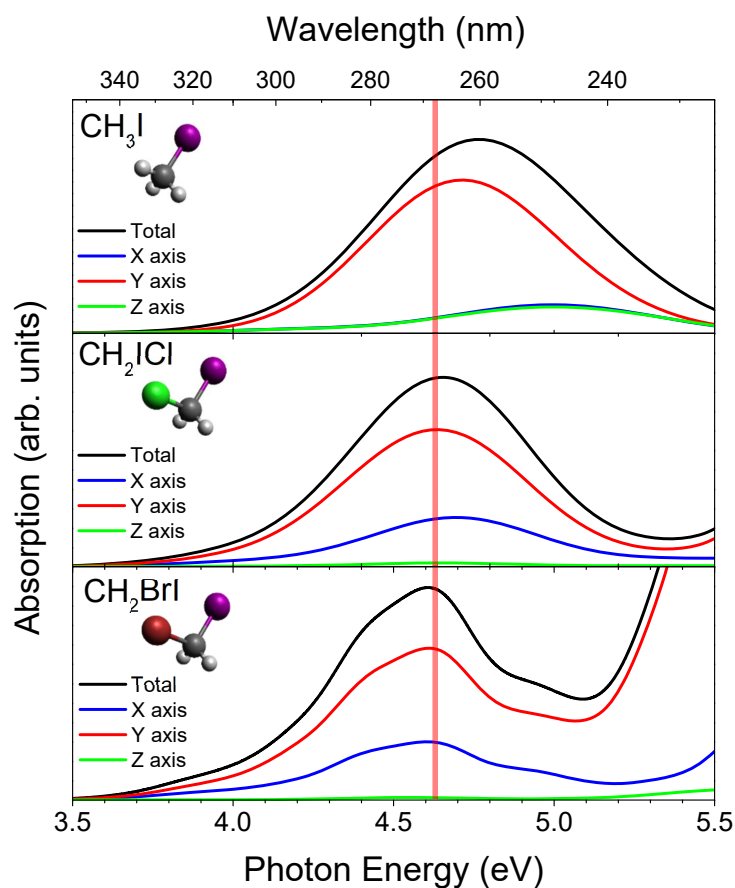

**Fig. S2** Computed absorption spectra for  $\text{CH}_3\text{I}$  (top),  $\text{CH}_2\text{ICl}$  (b) and  $\text{CH}_2\text{IBr}$  (c) as a function of the transition dipole moment axis. X axis represents a perpendicular orientation with respect to the C-I bond (in the I-C-Cl plane for  $\text{CH}_2\text{ICl}$  and in the I-C-Br plane for  $\text{CH}_2\text{IBr}$ ), Y axis represents a parallel orientation to the C-I bond and Z axis represents a perpendicular orientation with respect to the C-I bond and perpendicular to the I-C-Cl plane for  $\text{CH}_2\text{ICl}$  and in the I-C-Br plane for  $\text{CH}_2\text{IBr}$ . The vertical arrows indicate the excitation wavelengths of 268 nm used in the present experiments.

**Table S1** *Ab initio* energy at the Franck-Condon (FC) geometry of the CH<sub>3</sub>I, CH<sub>2</sub>ICl and CH<sub>2</sub>BrI molecules, symmetry in the C<sub>s</sub> and C<sub>3v</sub> groups as well as the transition dipole moment (TDM) – total and for each axis – of the computed electronic state. X axis is located in the I-C-Ω plane, perpendicular to the C-I bond, Y axis in the I-C-Ω plane, along the C-I bond and the Z axis perpendicular to the I-C-Ω plane, where Ω= H, Cl or Br. The table has been truncated up to the 5A' (<sup>1</sup>Q<sub>1</sub>) state. Complete list of computed states in Table 2.

| State number                 | Franck-Condon energy (eV) | Symmetry (C <sub>s</sub> ) | Correlated symmetry (C <sub>3v</sub> ) | TDM     | X        | Y        | Z        |
|------------------------------|---------------------------|----------------------------|----------------------------------------|---------|----------|----------|----------|
| CH <sub>3</sub> I molecule   |                           |                            |                                        |         |          |          |          |
| 1                            | 0                         |                            | –                                      | 0.66193 | 0.00013  | 0.66193  | 0.00000  |
| 2                            | 4.20                      |                            | <sup>3</sup> Q <sub>2</sub>            | 0.00067 | 0.00066  | 0.00009  | 0.00001  |
| 3                            | 4.20                      |                            | <sup>3</sup> Q <sub>2</sub>            | 0.00060 | 0.00001  | 0.00000  | 0.00060  |
| 4                            | 4.36                      |                            | <sup>3</sup> Q <sub>1</sub>            | 0.02046 | 0.00000  | 0.00000  | 0.02046  |
| 5                            | 4.36                      |                            | <sup>3</sup> Q <sub>1</sub>            | 0.02046 | 0.02046  | 0.00005  | 0.00000  |
| 6                            | 4.71                      |                            | <sup>3</sup> Q <sub>0–</sub>           | 0.00000 | 0.00000  | 0.00000  | 0.00000  |
| 7                            | 4.79                      |                            | <sup>3</sup> Q <sub>0+</sub>           | 0.12158 | 0.00028  | 0.12158  | 0.00000  |
| 8                            | 5.07                      |                            | <sup>1</sup> Q <sub>1</sub>            | 0.05258 | 0.05258  | 0.00004  | 0.00000  |
| 9                            | 5.07                      |                            | <sup>1</sup> Q <sub>1</sub>            | 0.05255 | 0.00000  | 0.00000  | 0.05255  |
| 10                           | 6.53                      |                            | <sup>2</sup> A <sub>2</sub>            | 0.00000 | 0.00000  | 0.00000  | 0.00000  |
| 11                           | 6.55                      |                            | 4E                                     | 0.01528 | 0.01528  | 0.00002  | 0.00001  |
| 12                           | 6.55                      |                            | –                                      | 0.01529 | 0.00001  | 0.00000  | 0.01529  |
| CH <sub>2</sub> ICl molecule |                           |                            |                                        |         |          |          |          |
| 1                            | 0                         | 1A'                        | –                                      | 0.51543 | 0.434820 | 0.276770 | 0.000000 |
| 2                            | 3.92                      | 1A''                       | <sup>3</sup> Q <sub>2</sub>            | 0.00042 | 0.000000 | 0.000000 | 0.000421 |
| 3                            | 3.92                      | 2A'                        | <sup>3</sup> Q <sub>2</sub>            | 0.00679 | 0.000250 | 0.006780 | 0.000000 |
| 4                            | 4.06                      | 2A''                       | <sup>3</sup> Q <sub>1</sub>            | 0.01131 | 0.000000 | 0.000000 | 0.011310 |
| 5                            | 4.07                      | 3A'                        | <sup>3</sup> Q <sub>1</sub>            | 0.06245 | 0.042500 | 0.045760 | 0.000000 |
| 6                            | 4.38                      | 3A''                       | <sup>3</sup> Q <sub>0–</sub>           | 0.00120 | 0.000000 | 0.000000 | 0.001193 |
| 7                            | 4.49                      | 4A'                        | <sup>3</sup> Q <sub>0+</sub>           | 0.15119 | 0.062330 | 0.137750 | 0.000000 |
| 8                            | 4.70                      | 4A''                       | <sup>1</sup> Q <sub>1</sub>            | 0.02766 | 0.000000 | 0.000000 | 0.027661 |
| 9                            | 4.76                      | 5A'                        | <sup>1</sup> Q <sub>1</sub>            | 0.19746 | 0.122770 | 0.154660 | 0.000000 |
| 10                           | 5.47                      | 5A''                       | <sup>2</sup> A <sub>2</sub>            | 0.00136 | 0.000000 | 0.000000 | 0.001360 |
| 11                           | 5.50                      | 6A''                       | 4E                                     | 0.01352 | 0.000000 | 0.000000 | 0.013521 |
| 12                           | 5.51                      | 6A'                        | –                                      | 0.06060 | 0.043330 | 0.042370 | 0.000000 |
| 13                           | 6.09                      | 7A'                        | –                                      | 0.04810 | 0.019330 | 0.044050 | 0.000000 |
| 14                           | 6.09                      | 7A''                       | –                                      | 0.00335 | 0.000000 | 0.000000 | 0.003352 |
| 15                           | 6.09                      | 8A'                        | –                                      | 0.05187 | 0.020330 | 0.047720 | 0.000000 |
| CH <sub>2</sub> BrI molecule |                           |                            |                                        |         |          |          |          |
| 1                            | 0                         | 1A'                        | –                                      | 0.48635 | 0.439920 | 0.207390 | 0.000000 |
| 2                            | 3.83                      | 1A''                       | <sup>3</sup> Q <sub>2</sub>            | 0.00241 | 0.000000 | 0.000000 | 0.002411 |
| 3                            | 3.83                      | 2A'                        | <sup>3</sup> Q <sub>2</sub>            | 0.00330 | 0.003140 | 0.001030 | 0.000000 |
| 4                            | 3.96                      | 2A''                       | <sup>3</sup> Q <sub>1</sub>            | 0.01134 | 0.000000 | 0.000000 | 0.011340 |
| 5                            | 4.00                      | 3A'                        | <sup>3</sup> Q <sub>1</sub>            | 0.11854 | 0.068830 | 0.096510 | 0.000000 |
| 6                            | 4.28                      | 3A''                       | <sup>3</sup> Q <sub>0–</sub>           | 0.00054 | 0.000000 | 0.000000 | 0.000540 |
| 7                            | 4.39                      | 4A'                        | <sup>3</sup> Q <sub>0+</sub>           | 0.13841 | 0.052570 | 0.128040 | 0.000000 |
| 8                            | 4.60                      | 4A''                       | <sup>1</sup> Q <sub>1</sub>            | 0.03196 | 0.000000 | 0.000000 | 0.031960 |
| 9                            | 4.62                      | 5A'                        | <sup>1</sup> Q <sub>1</sub>            | 0.34889 | 0.188250 | 0.293740 | 0.000000 |
| 10                           | 5.01                      | 5A''                       | <sup>2</sup> A <sub>2</sub>            | 0.00498 | 0.000000 | 0.000000 | 0.004976 |
| 11                           | 5.05                      | 6A'                        | 4E                                     | 0.1049  | 0.061870 | 0.084710 | 0.000000 |
| 12                           | 5.16                      | A''                        | –                                      | 0.00884 | 0.000000 | 0.000000 | 0.008831 |
| 13                           | 5.17                      | 7A'                        | –                                      | 0.08522 | 0.013610 | 0.084130 | 0.000000 |
| 14                           | 5.25                      | 7A''                       | –                                      | 0.00077 | 0.000000 | 0.000000 | 0.000770 |
| 15                           | 5.27                      | 8A'                        | –                                      | 0.02185 | 0.004100 | 0.021460 | 0.000000 |
