# Supplementary figures and images for: Halogen-atom effect on the ultrafast photodissociation dynamics of the dihalomethanes CH2ICl and CH2BrI
Source: Royal Society of Chemistry journal article supplement (doi:10.1039/c8cp03600d), 2018-01-01

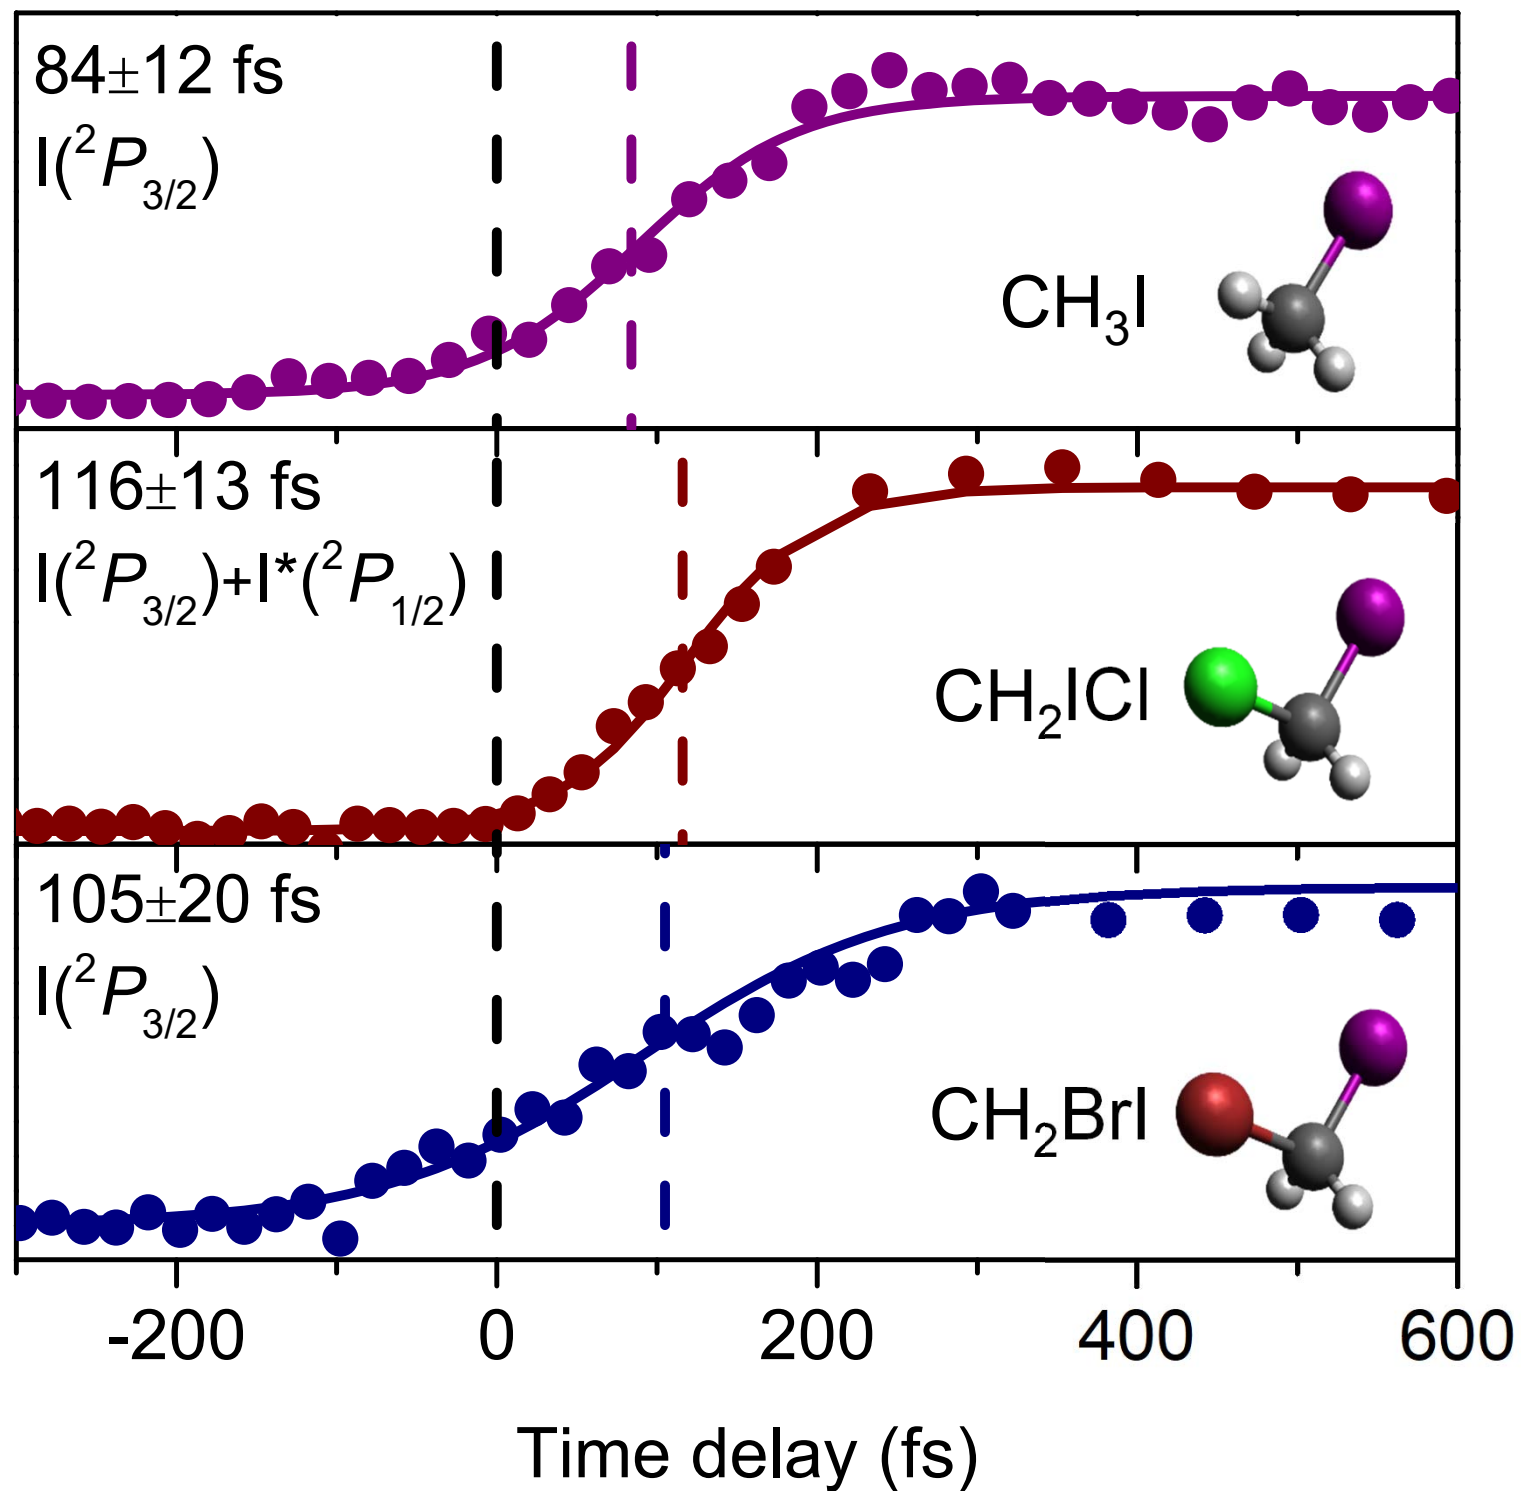

Supplement: c8cp03600d1.zip [file FigS1.pdf › FigS1.pdf]

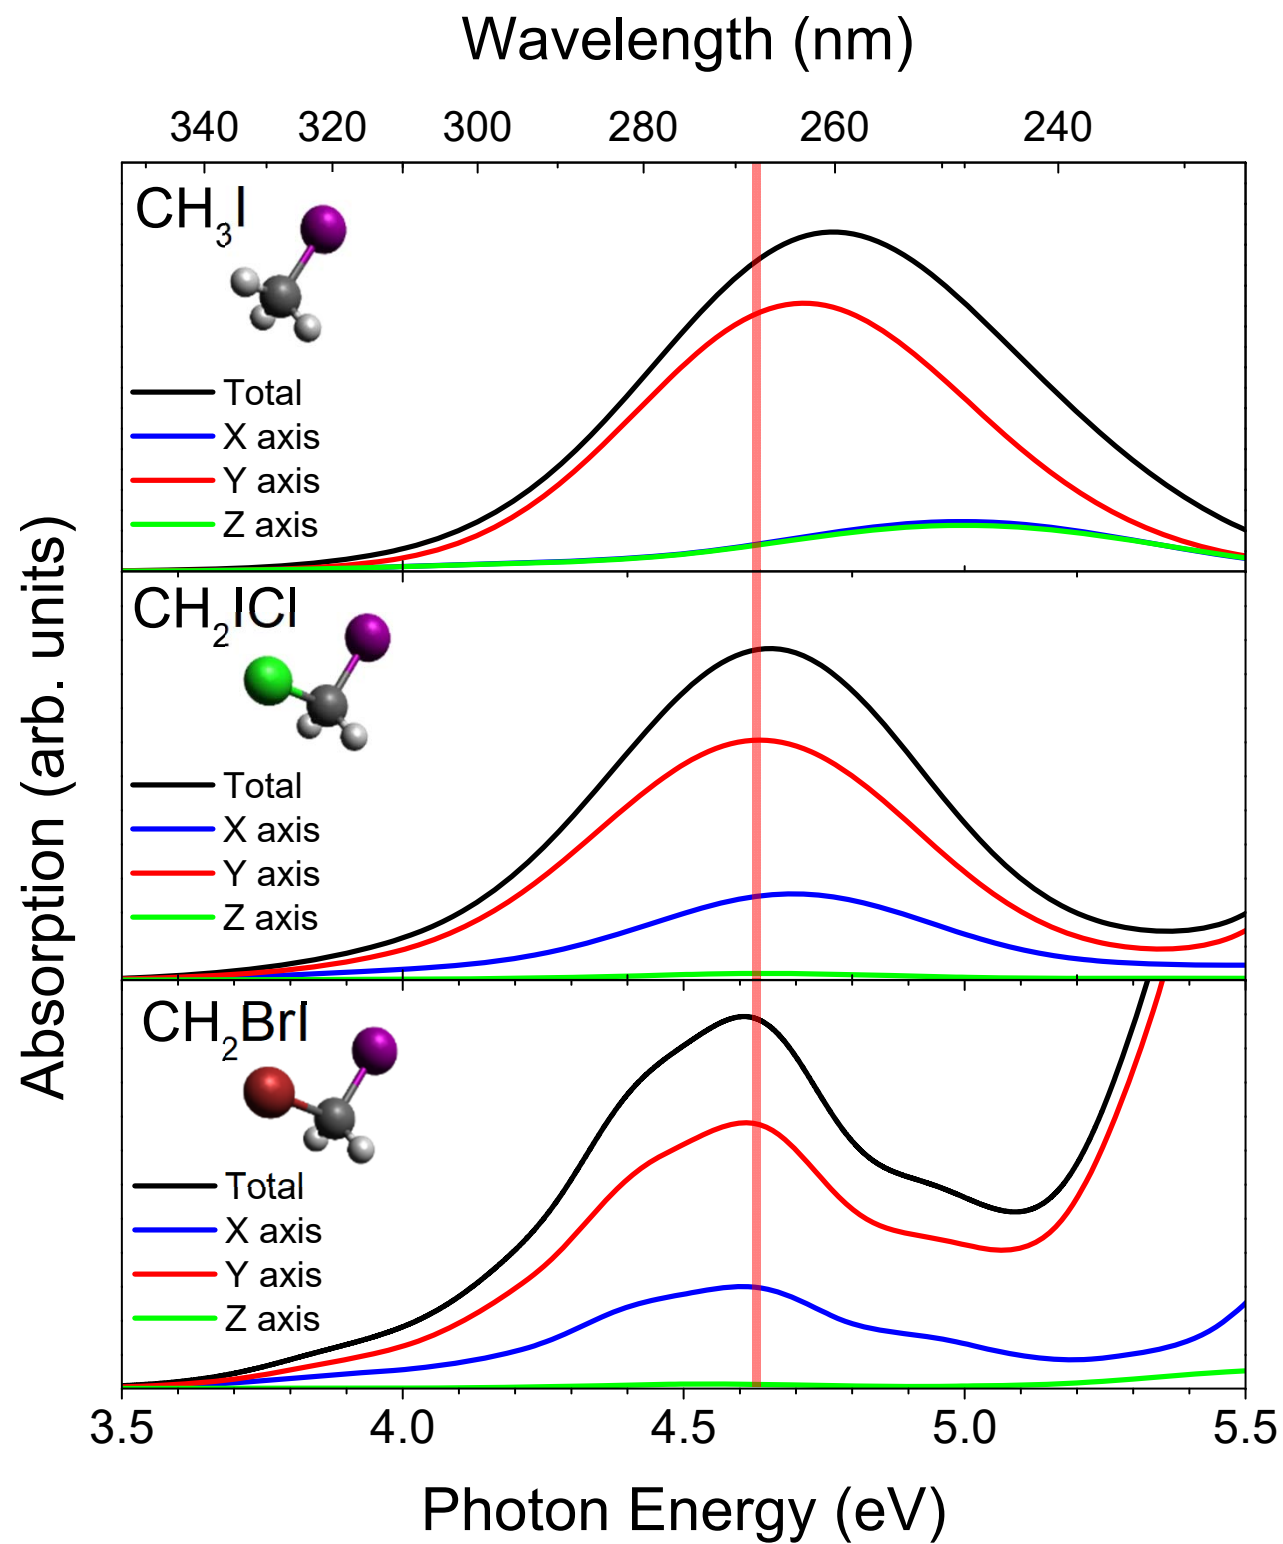

Supplement: c8cp03600d1.zip [file FigS2.pdf › FigS2.pdf]
